# Supplementary figures and images for: Development and reliability of a novel ultrasonographic joint-specific scoring system for synovitis with reference atlas for patients with juvenile idiopathic arthritis
Source: PubMed Central journal article supplement — RMD Open. 2021 Apr 21;7(2):e001581. doi: 10.1136/rmdopen-2021-001581 (PMC8061832; doi:10.1136/rmdopen-2021-001581), 2021-04-21

**Supplementary Figure 1: The study was conducted through the following six steps**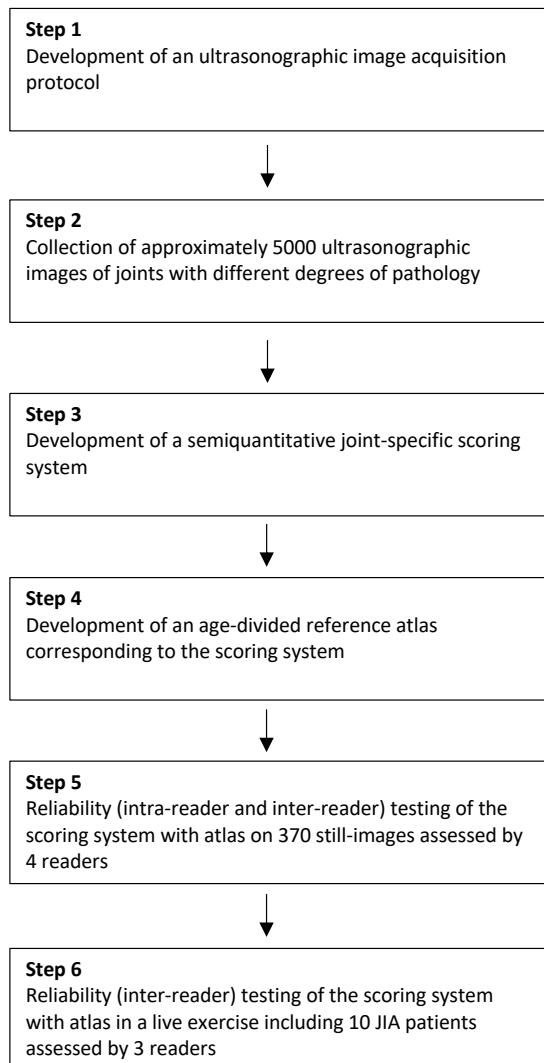

Supplement: rmdopen-2021-001581supp001.pdf [file rmdopen-2021-001581supp001.pdf]
